# Supplementary material
Source: MDPI journal article supplement (https://www.mdpi.com/2311-7524/8/8/754)
Supplement: s1 [file s1 › horticulturae-1857725-supplementary.pdf]

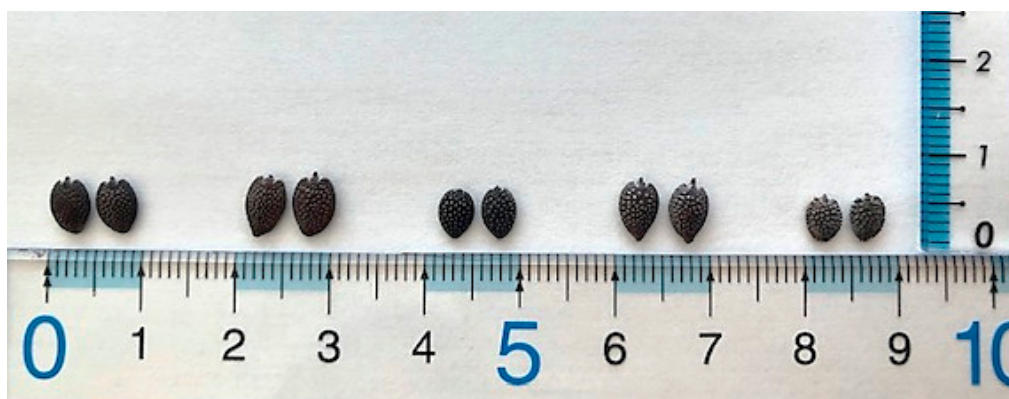

**Figure S1.** Seed of five passion fruit genotypes. From left to right (each two seeds): INIAP 2009, P10, POR1 (all *P. edulis* f. *flavicarpa*), Gulupa (*P. edulis* f. *edulis*) and PICH1 (*P. maliformis*).

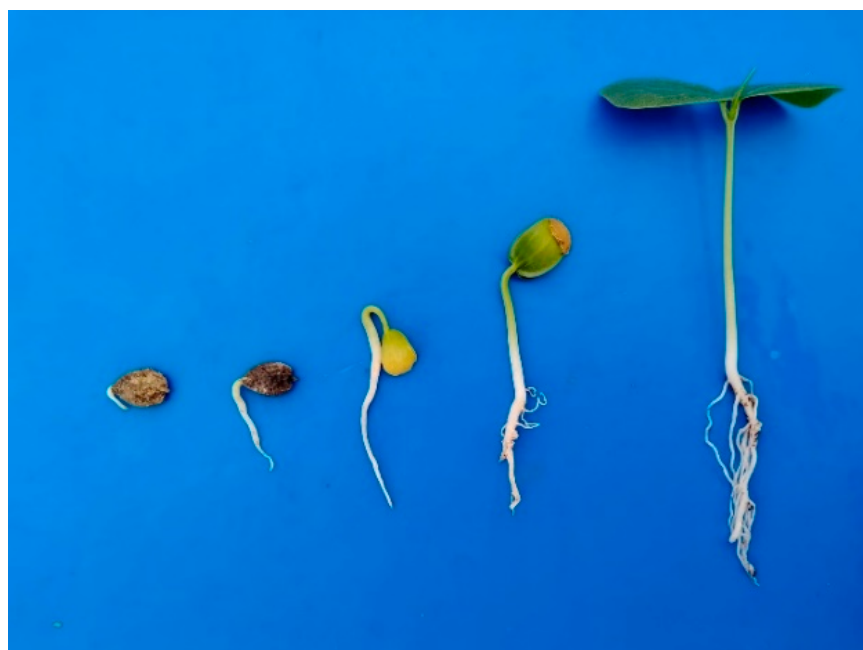

**Figure S2.** Different stages of seedling germination of *P. edulis* f. *flavicarpa*. The third stage (from the left) represents the emergence of the epicotyl and the fifth stage the developed seedling (germination).

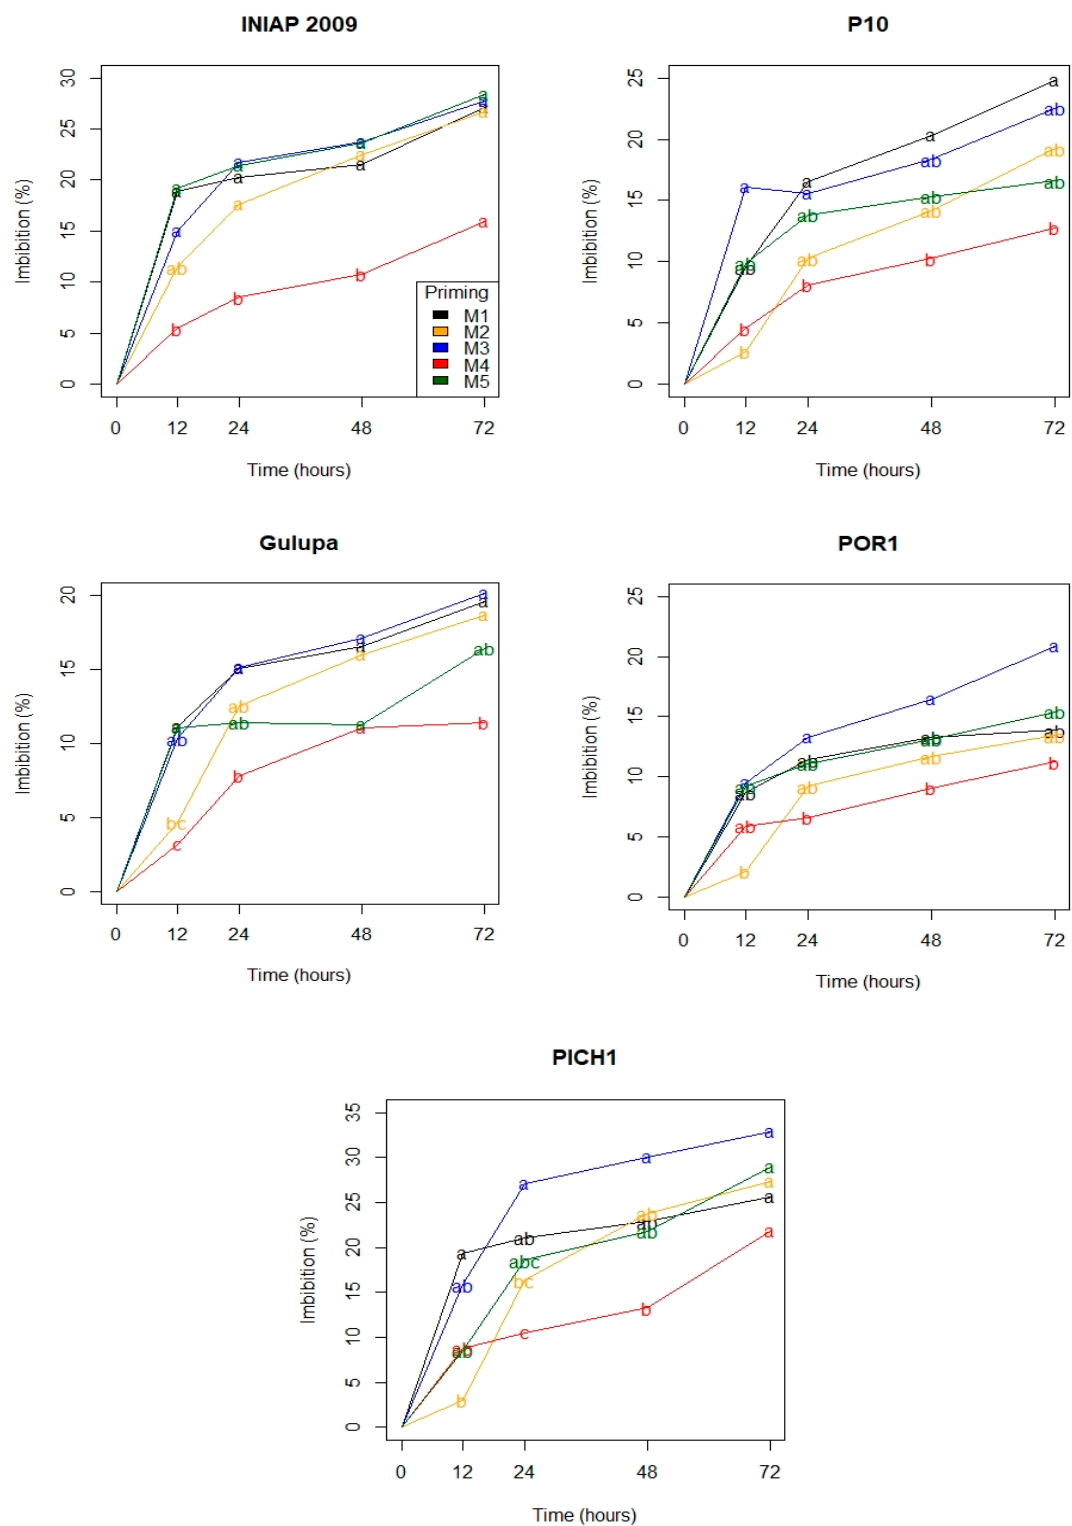

**Figure S3.** Seed imbibition of the five genotypes of passion fruit at 0, 12, 24, 48 and 72 hours. M1= Water, M2= Hydrogen peroxide, M3= Potassium nitrate, M4= PEG 6000, M5= Gibberellic acid. Different letters indicate significant differences ( $p < 0.05$ ) using the ANOVA analysis followed by Tukey's test.

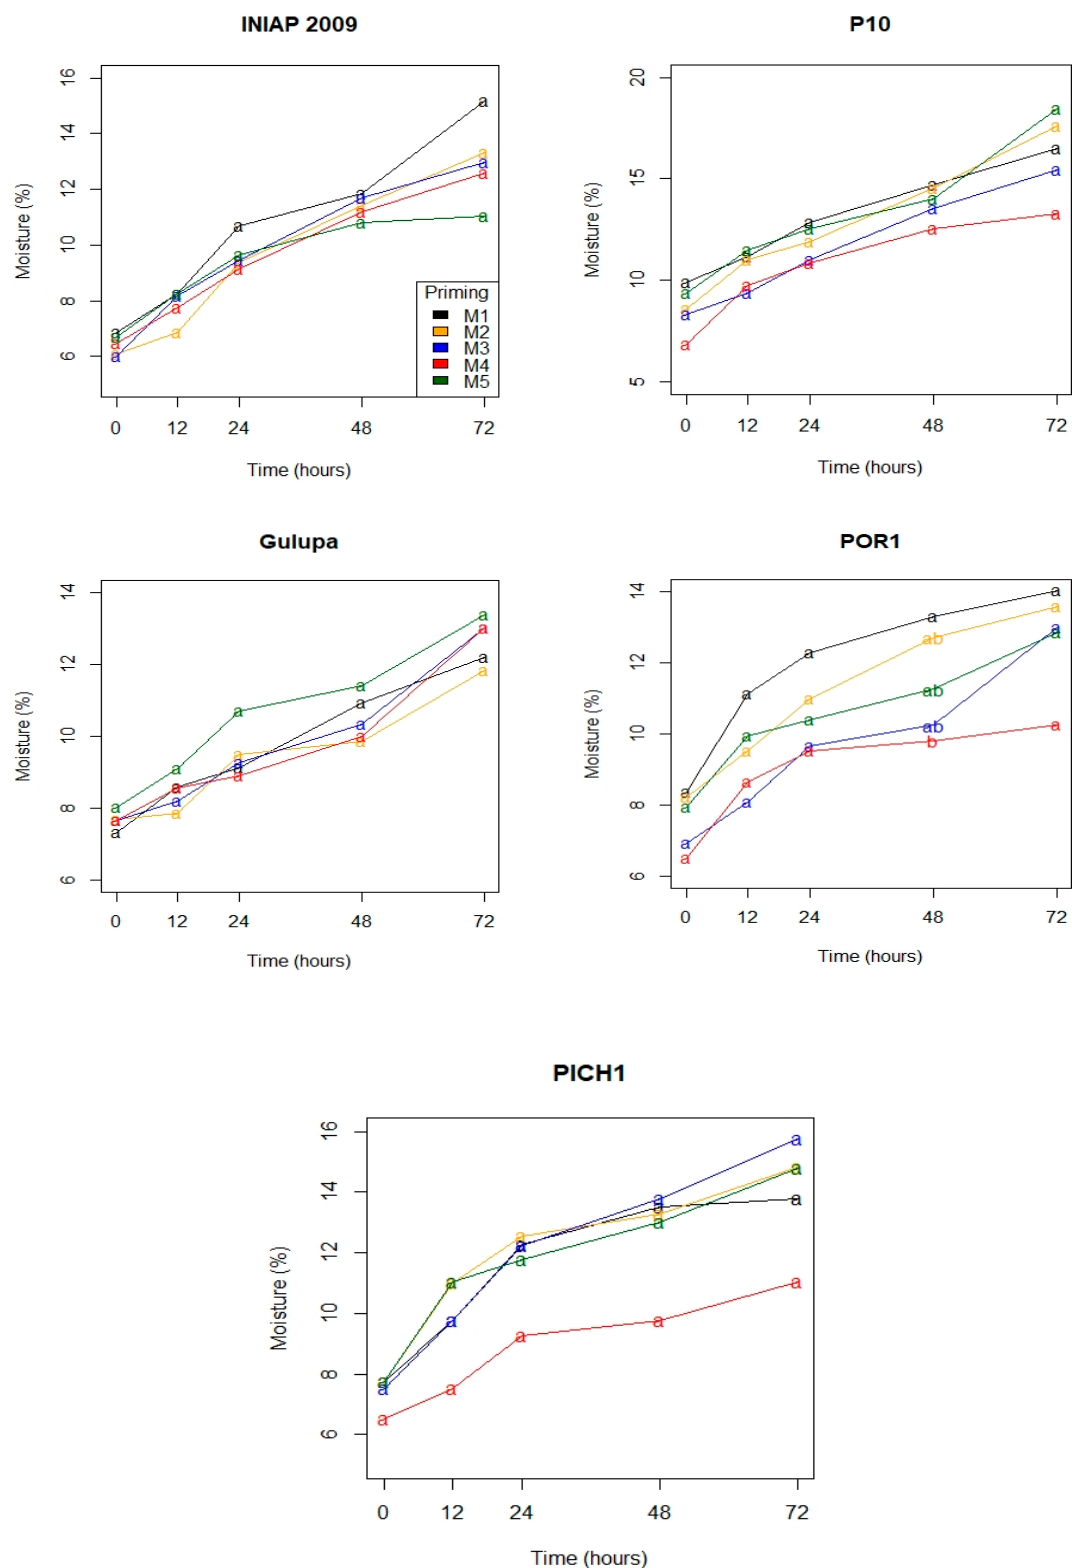

**Figure S4.** Seed moisture of the five genotypes of passion fruit at 0, 12, 24, 48 and 72 hours. M1= Water, M2= Hydrogen peroxide, M3= Potassium nitrate, M4= PEG 6000, M5= Gibberellic acid. Different letters indicate significant differences ( $p < 0.05$ ) using the ANOVA analysis followed by Tukey's test.

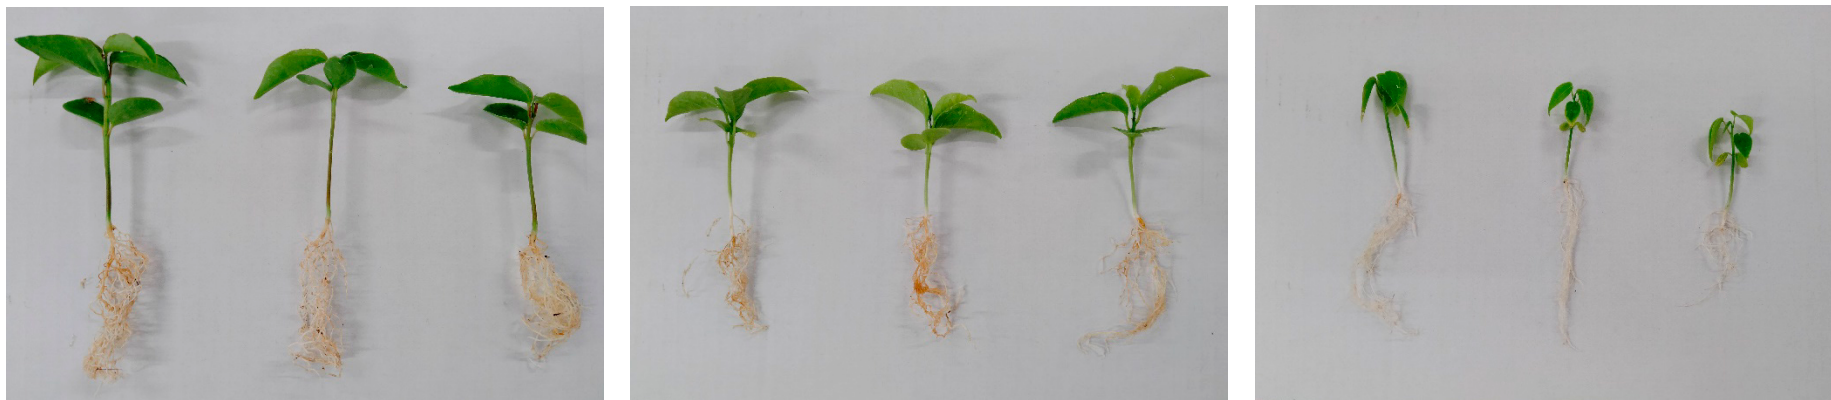

**Figure S5.** Seedlings of *P. edulis* f. *flavicarpa* (INIAP 2009, left), *P. edulis* f. *edulis* (Gulupa, center) and *P. maliformis* (POR1, right). Seeds were treated with PEG 6000.

**Table S1.** Pearson correlation coefficients between the seed traits and the seedling traits.

|                   | Seed<br>length | Seed<br>width | Seed<br>thickness   | Seed<br>weight | Seedling<br>height  | Root<br>length      | Top fresh<br>weight | Root fresh<br>weight | Top dry<br>weight   | Root dry<br>weight |
|-------------------|----------------|---------------|---------------------|----------------|---------------------|---------------------|---------------------|----------------------|---------------------|--------------------|
| Seed length       | 1              | 0.920*        | 0.944*              | 0.955*         | 0.955*              | 0.939*              | 0.958*              | 0.951*               | 0.962**             | 0.978**            |
| Seed width        |                | 1             | 0.800 <sup>ns</sup> | 0.915*         | 0.800 <sup>ns</sup> | 0.833 <sup>ns</sup> | 0.815 <sup>ns</sup> | 0.884*               | 0.815 <sup>ns</sup> | 0.879*             |
| Seed thickness    |                |               | 1                   | 0.964**        | 0.900*              | 0.984**             | 0.990**             | 0.978**              | 0.975**             | 0.984**            |
| Seed weight       |                |               |                     | 1              | 0.863 <sup>ns</sup> | 0.978**             | 0.960**             | 0.992**              | 0.943*              | 0.983**            |
| Seedling height   |                |               |                     |                | 1                   | 0.902*              | 0.942*              | 0.853 <sup>ns</sup>  | 0.967**             | 0.935*             |
| Root length       |                |               |                     |                |                     | 1                   | 0.991**             | 0.970**              | 0.981**             | 0.990**            |
| Top fresh weight  |                |               |                     |                |                     |                     | 1                   | 0.960**              | 0.996**             | 0.993**            |
| Root fresh weight |                |               |                     |                |                     |                     |                     | 1                    | 0.938**             | 0.978**            |
| Top dry weight    |                |               |                     |                |                     |                     |                     |                      | 1                   | 0.987**            |
| Root dry weight   |                |               |                     |                |                     |                     |                     |                      |                     | 1                  |

\*\*=statistical significance at 1%, \*= statistical significance at 5%, and ns= no statistical significance.
